# Supplementary material for: Synthesis of a hierarchically structured Fe3O4–PEI nanocomposite for the highly sensitive electrochemical determination of bisphenol A in real samples
Source: Royal Society of Chemistry journal article supplement (doi:10.1039/d0nj03830j), 2020-01-01
Supplement: d0nj03830j1.pdf [file d0nj03830j1.pdf]

Supplementary Information

for

**Synthesis of hierarchically structured Fe<sub>3</sub>O<sub>4</sub>-PEI nanocomposite for high sensitive electrochemical determination of bisphenol A in real samples**

**A.G. Ramu <sup>a</sup>, L. Telmenbayar <sup>a,b</sup>, J. Theerthagiri <sup>c,d</sup>, D. Yang <sup>a</sup>, M. Song <sup>a</sup>  
and D. Choi <sup>a\*</sup>**

<sup>a</sup> *Department of Materials Science and Engineering, Hongik University, 2639-Sejong-ro, Jochiwon-eup, Sejong-city, 30016, South Korea.*

<sup>b</sup> *School of Mechanical Engineering and Transportation, Mongolian University of Science and Technology, Ulaanbaatar, Mongolia.*

<sup>c</sup> *Centre of Excellence for Energy Research, Sathyabama Institute of Science and Technology (Deemed to be University), Chennai 600119, India.*

<sup>d</sup> *Department of Chemistry and Research Institute of Natural Sciences, Gyeongsang National University, Jinju 52828, South Korea.*

**\*Corresponding author** [djchoi@hongik.ac.kr](mailto:djchoi@hongik.ac.kr)

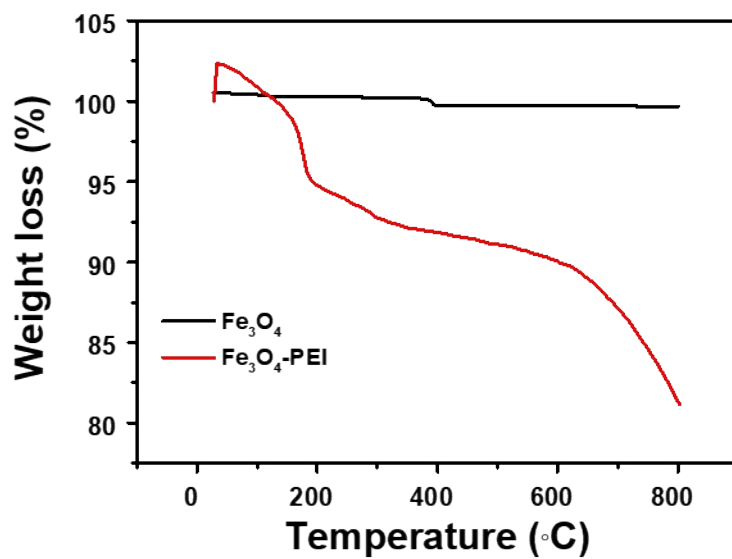

**Fig. SI 1** Thermogravimetric analysis of hydrothermally synthesised Fe<sub>3</sub>O<sub>4</sub> and Fe<sub>3</sub>O<sub>4</sub>-PEI nanocomposite.

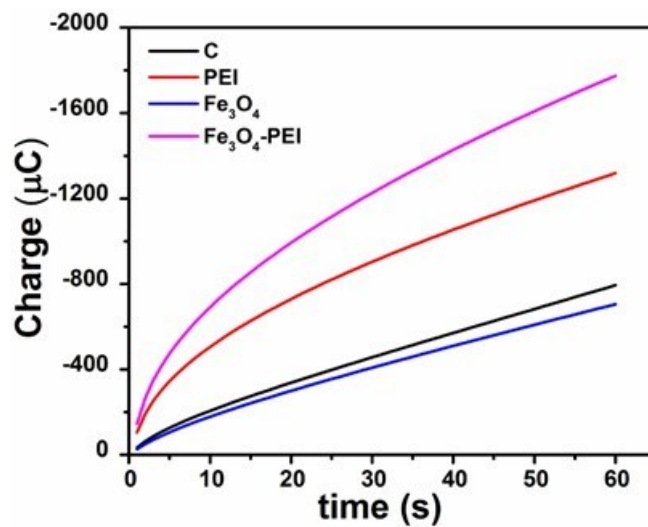

**Fig. SI 2** Chronocoulometry for C, Fe<sub>3</sub>O<sub>4</sub> NPs, PEI and Fe<sub>3</sub>O<sub>4</sub>-PEI nanocomposite in 5 mM K<sub>3</sub>[Fe (CN)<sub>6</sub>]<sup>3-</sup> in 0.1 M KNO<sub>3</sub> solution.
